# Supplementary material
Source: PubMed Central journal article supplement (PMC1949384)
Supplement: mbc_E06-09-0869_1.pdf [file mbc_E06-09-0869_1.pdf]

# Figure 1

**A.**

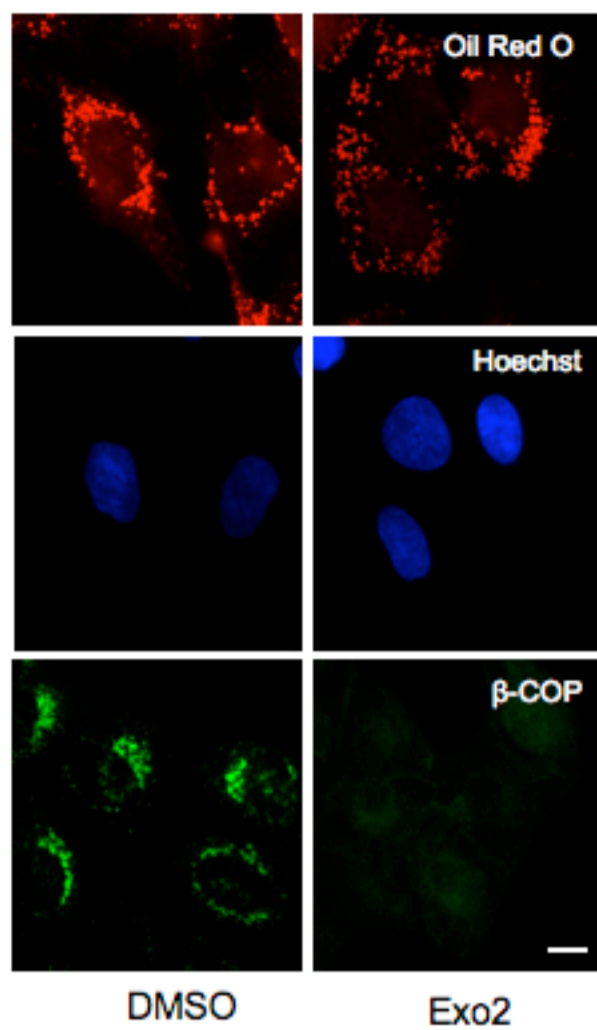

**B.**

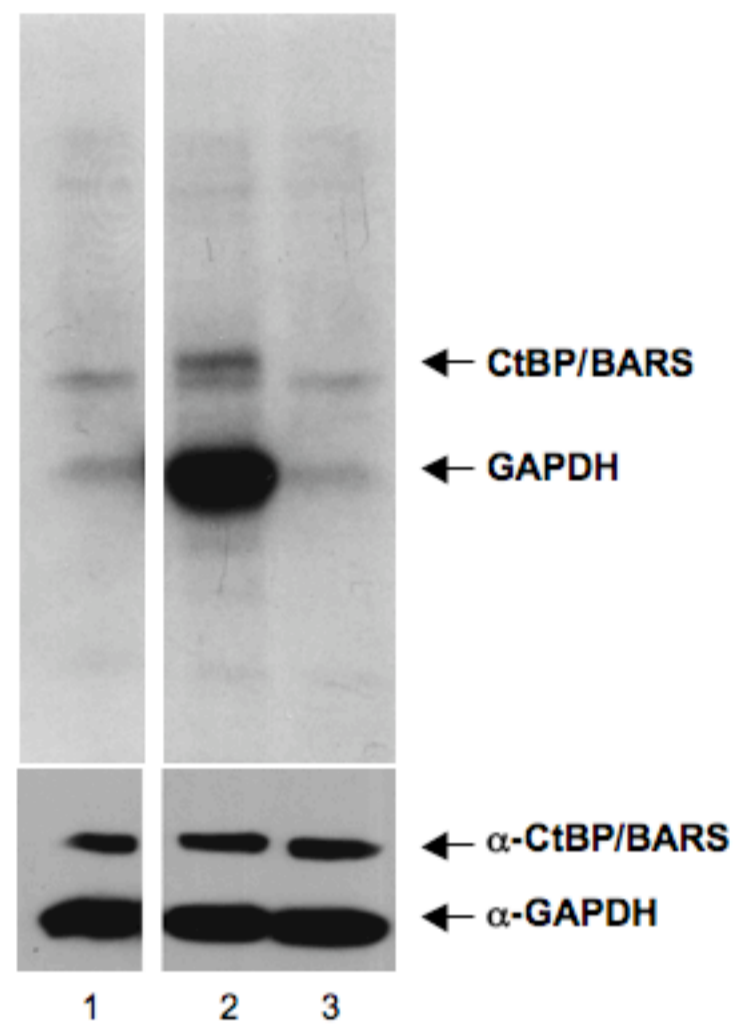

# Figure 2

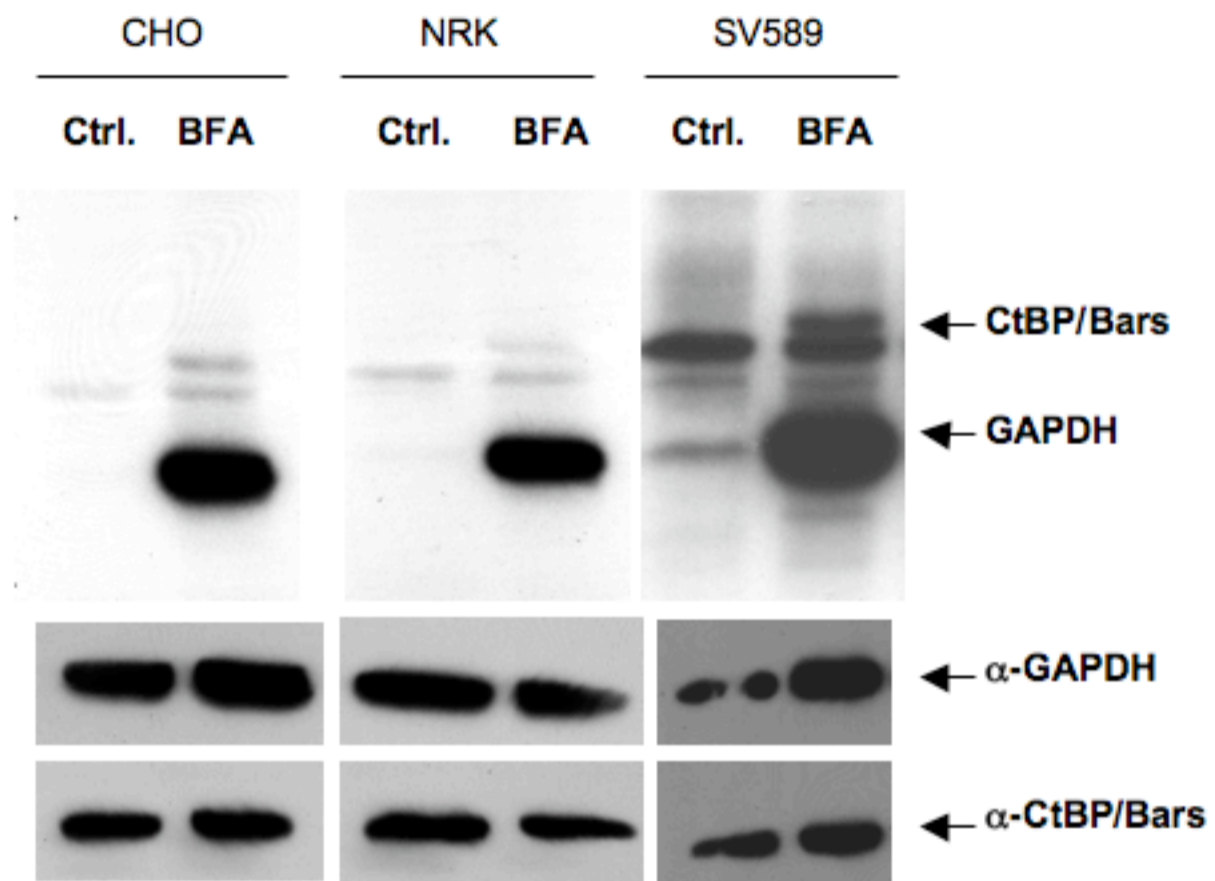

# Figure 3

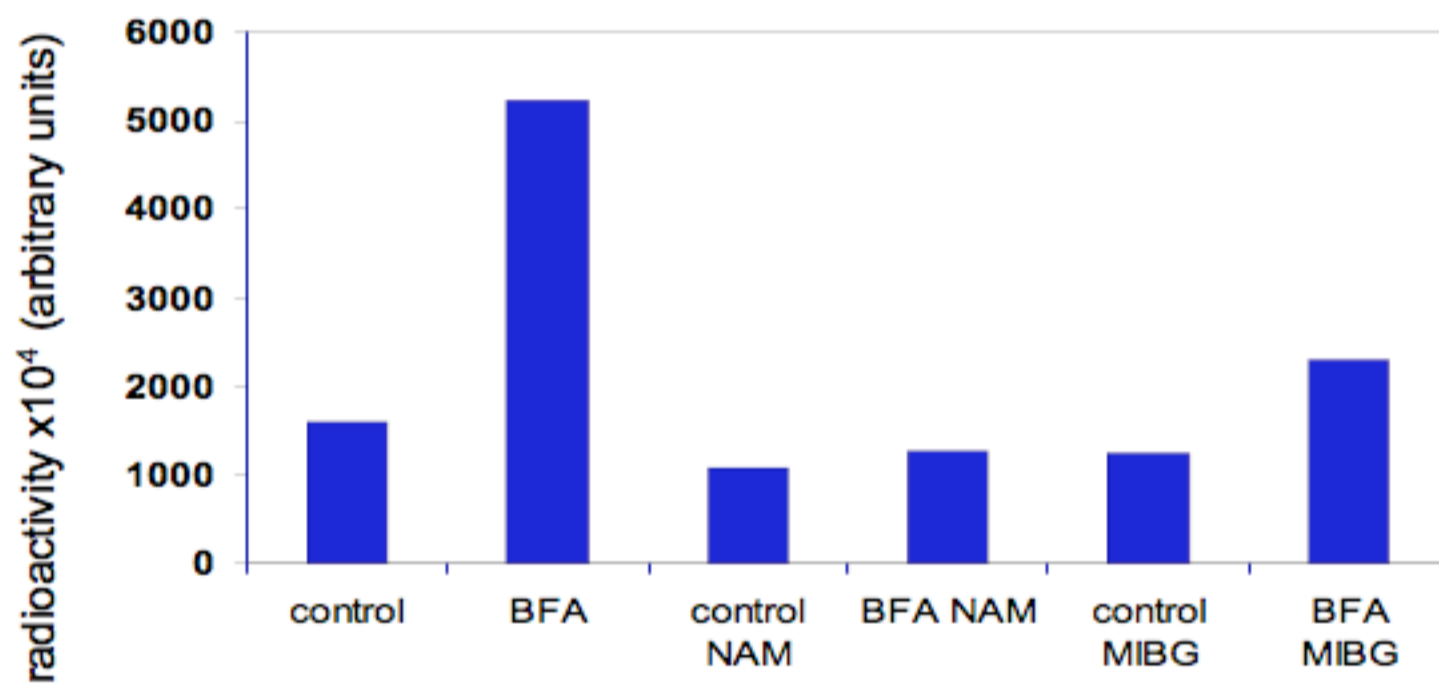

**Supplemental Movie** BFA does not inhibit the uptake of free fatty acids. NRK cells were incubated in the presence of 100  $\mu$ M oleate plus 2  $\mu$ g/ml BFA in CO<sub>2</sub> independent media for up to 18 h at 37°C. The original DIC images were taken at 1 frame per minute for 12 h after the start of incubation.

**Supplemental Figure 1** Lipid loss does not occur in response to Exo2 induced Golgi fragmentation. A) NRK cells were treated with 100  $\mu$ M oleate for 24 hrs, washed and then incubated in the presence of 2  $\mu$ g/ml Exo2 or DMSO carrier for 12 h at 37°C. Cells were fixed and stained for neutral lipids with oil red O or DNA with Hoechst dye (upper panel). To confirm that Exo2 caused Golgi fragmentation, another coverslip from the same experiment was fixed, permeabilized and stained with antibodies against  $\beta$ COP (lower panel). Scale bar =10  $\mu$ m. B) cytosol from CHO cells containing [<sup>32</sup>P-NAD] was either treated with DMSO (control, lane 1), incubated in the presence of 60  $\mu$ g/ml BFA (lane 2) or 60  $\mu$ g/ml Exo2 (lane 3) for 2 hr at 37°C. Membranes and cytosol were separated by centrifugation. The supernatant fraction was separated by SDS-PAGE, transferred to PVDF-membrane and processed for autoradiography. The PVDF-membrane was then processed for detection of GAPDH and CtBP1/BARS by immunoblotting.

**Supplemental Figure 2** BFA stimulates ribosylation of CtBP/BARS and GAPDH in various cell lines. Cytosol from cells as indicated (0.3 mg/ml for CHO and NRK, 0.5 mg/ml for SV589) containing [<sup>32</sup>P-NAD] were either treated with DMSO (Ctrl.) or 60  $\mu$ g/ml BFA for 2 hr at 37°C. Membranes and cytosol were separated by centrifugation. The supernatant fraction was separated by SDS-PAGE, transferred to PVDF-membrane and processed for autoradiography. The PVDF-membrane was then processed for detection of GAPDH and CtBP1/BARS by immunoblotting.

**Supplemental Figure 3** Quantification of BARS ribosylation. Samples from Fig 6A were processed for SDS-PAGE and transferred onto PVDF-membrane as described earlier. Membranes were exposed to a storage phosphor screen for 24 hr. Radioactivity was then visualized using a Phospho imager (Typhoon 9410 Image analysis; GE Healthcare, Piscataway, NJ) and quantified using ImageQuant TL software (GE Healthcare).
